# Supplementary material for: Multivariate statistical air mass discrimination for the high-alpine observatory at the Zugspitze mountain, Germany
Source: Copernicus journal article supplement (doi:10.5194/acp-2019-211), 2019-04-26
Supplement: Supplementary file 1 [file acp-2019-211-supplement.pdf]

# Supplement

## S1 Wind patterns at Zugspitze summit in February and March

Figure S1 shows the wind patterns at ZSG for each of the nine air mass regimes in the 2-month period February–March. The three "polluted" regimes indicated that ML air masses were often associated with southeasterly to southerly winds with varying velocities (Fig. S1a,d,g). Some of these air masses may reflect south foehn events, especially in the case of strong southerly winds.

For all other regimes, the wind direction was more variable. Strong southerly winds were also included in the regimes "mod. poll., high  $q$ ", "unpolluted, high  $q$ ", and "mod. poll., interm.  $q$ " (Fig. S1b,c,e), which suggests that foehn flows are not always associated with a strong uplift on the windward side of the Alps (Seibert, 1990) and can result in varying air mass characteristics. The regime "unpolluted, high  $q$ " exhibited the highest mean wind velocity ( $10.22 \text{ m s}^{-1}$ ) among the regimes, which would be in line with a fast transport of the air masses from the marine boundary layer to the UFS (Fig. S1c).

The regimes "unpolluted, low/interm.  $q$ " and "unpolluted, interm.  $q$ ", which were dominated by UFT/SIN air masses, exhibited similar mean wind velocities compared to the regimes of ML air masses (Fig. S1).

## S2 Statistical classification: Case study in March

In a case study, the regimes and classes of air masses were highlighted in the measured time series to gain insight in the transport processes involved and to check the plausibility of the classification. The period from 1 to 13 March 2014 mainly included two phases with contrasting air mass characteristics (Fig. S2). From 1 to 6 March, the three air mass regimes, which were attributed to the class ML, dominated (Fig. S2a) – mainly due to high CO (Fig. S2b), CH<sub>4</sub> (Fig. S2c), and CO<sub>2</sub> mixing ratios (Fig. S2d) that peaked on 5 and 6 March. From 7 to 12 March, the two air mass regimes, which were attributed to the class UFT/SIN in the absence of LRMD, dominated – due to low CO, CH<sub>4</sub>, and CO<sub>2</sub> mixing ratios, predominantly low  $q$  (Fig. S2e), and high O<sub>3</sub> mixing ratios (Fig. S2f). On 13 March, the regime "unpolluted, high  $q$ " indicated ambiguous air masses that originated either from the lower free troposphere or the marine boundary layer (Fig. S2a).

$\Delta\theta_v$  showed weak and strong diurnal variations in the phases from 1 to 6 March and from 7 to 13 March, respectively (Fig. S2g), indicating a shift from cloudy to clear-sky conditions, as confirmed by  $R_g$  measurements (Fig. S2s).  $p_{\text{GAP}}$  reached a minimum on 3 March, increased continuously and strongly until 6 March, and remained high until 13 March (Fig. S2h). These observations suggest that the ML air masses were lifted by a low pressure system and associated fronts whereas the UFT/SIN air masses descended in a high pressure system. This interpretation was supported by high rH (Fig. S2p), precipitation (Fig.

S2r), and a low  $R_g$  (Fig. S2s) during the strong pressure increase and low rH, absent precipitation and high  $R_g$  during the high pressure phase.

The remaining chemical measurements were in line with the classification.  $\text{NO}_y$ ,  $\text{NO}_x$  (Fig. S2m), and  $^{222}\text{Rn}$  concentrations (Fig. S2n) were substantially higher and  $^7\text{Be}$  concentrations (Fig. S2o) were much lower for the ML than for the UFT/SIN air masses in the case study. The eBC (Fig. S2j) and  $N_{90}$  concentrations (Fig. S2k) tended to be higher for the ML than for the UFT/SIN air masses but temporary wet deposition resulted in strong variations (Fig. S2j,k). The  $\text{PM}_{10}$  concentration was only slightly higher for the ML air masses (median of  $3.0 \mu\text{g m}^{-3}$ ) than for the UFT/SIN air masses (median of  $2.3 \mu\text{g m}^{-3}$ ) (Fig. S2i). On 11 March 2014, a stratospheric intrusion was evident from exceptionally high Be-7 (Fig. S2o) and  $\text{O}_3$  concentrations (Fig. S2f) of  $26 \text{ mBq m}^{-3}$  and 79 ppb, respectively, and a low relative humidity of 12 % (Fig. S2p).

10 The ceilometer-based MLH at GAP was mostly missing in the period from 1 to 6 March because the uplift of ML air masses was associated with low-level clouds and precipitation (Fig. S2v). From 7 to 12 March, the MLH at GAP mostly showed diurnal variations with afternoon maxima but remained at least 300 m lower than the level of the UFS, which is in line with the statistical classification. Wind direction (Fig. S2t) and velocity (Fig. S2u) at ZSG did not differ significantly between ML and UFT/SIN air masses in the case study.

## References

Seibert, P.: South Foehn Studies Since the ALPEX Experiment, *Meteorology and Atmospheric Physics*, 43, 91–103, 1990.

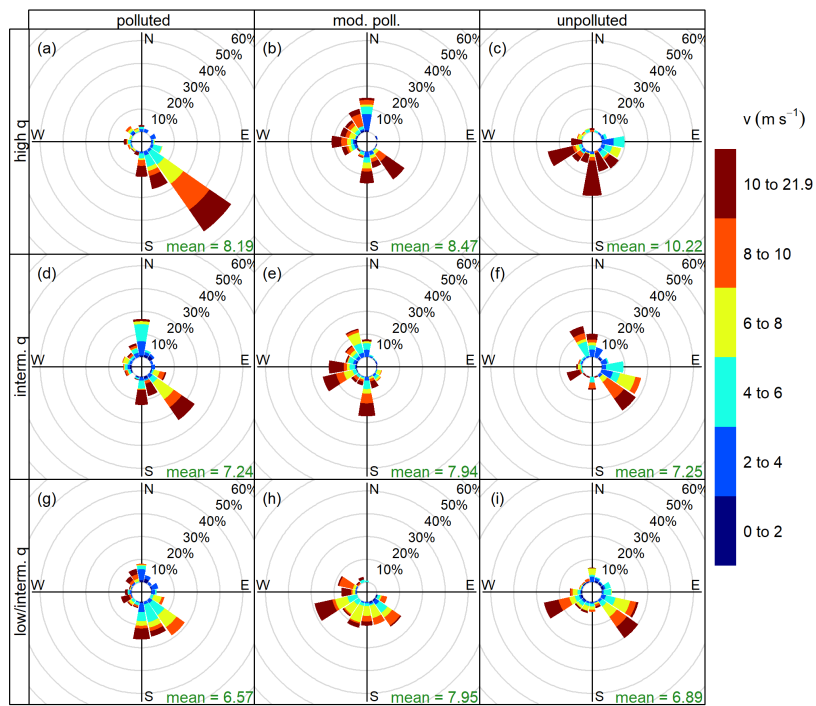

**Figure S1.** Windrose plots showing the frequency of counts by wind direction and velocity ( $v$ ) at Zugspitze summit for the nine air mass regimes in February and March 2014.

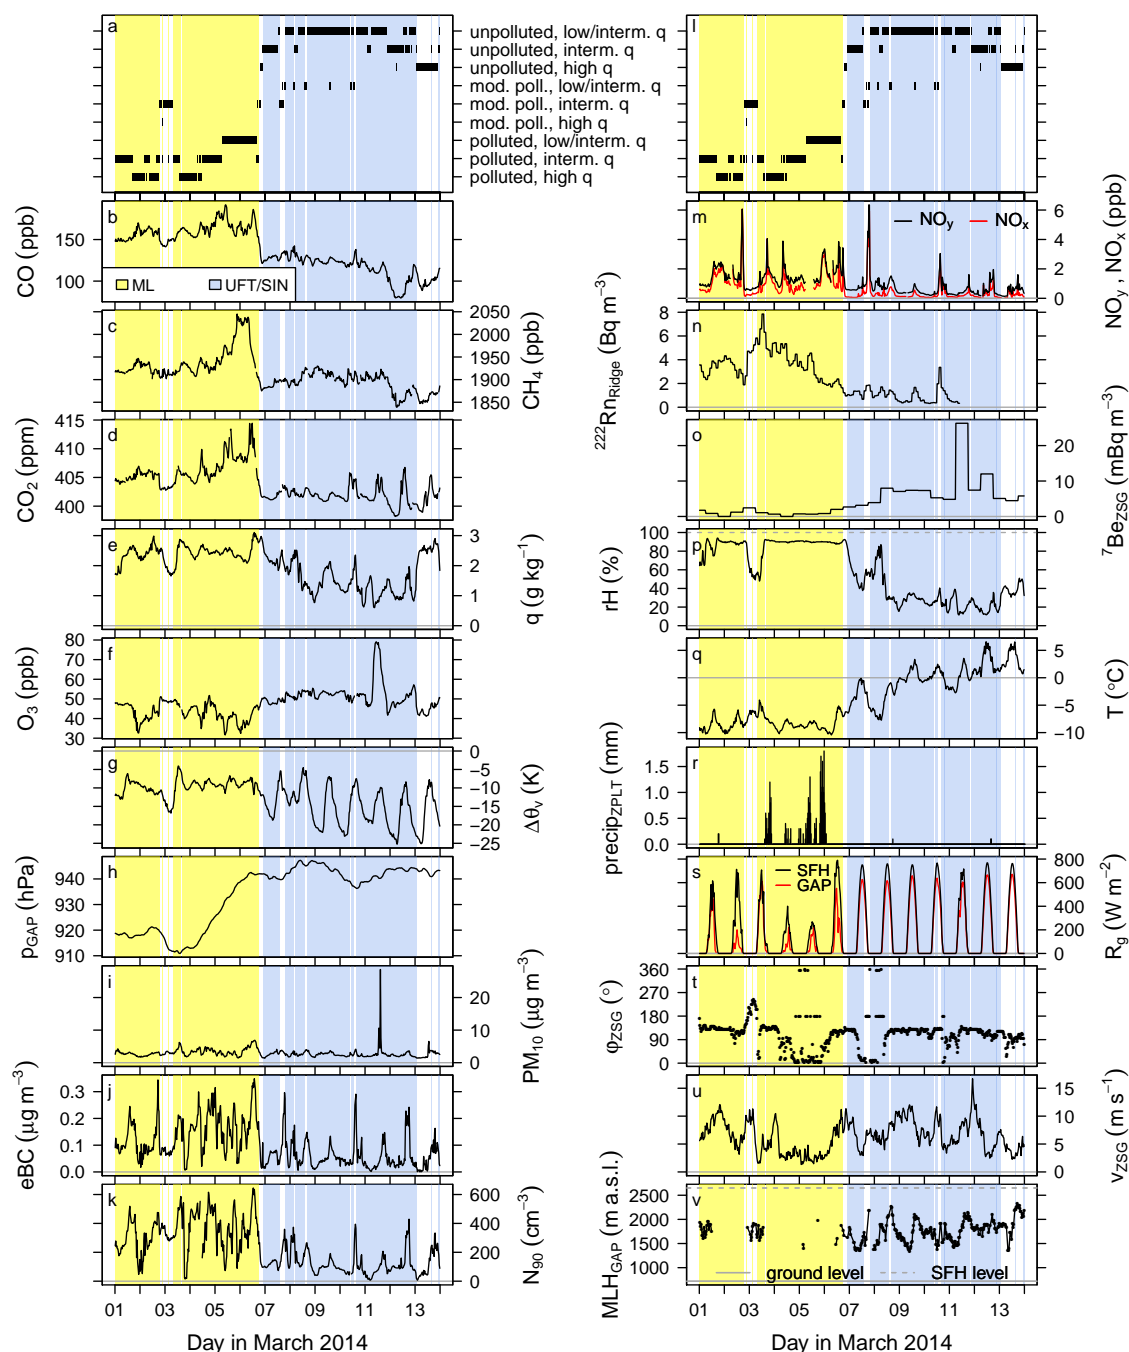

**Figure S2.** Time series of air mass regimes (a,l), input variables for the classification (b–i), and validation variables (j,k,m–v) from 1 to 13 March 2014. Unless labeled differently, the data was measured at the UFS except for  $\Delta\theta_v$  that represents the maximum difference among the sites. The color shading highlights the most important air mass classes. Symbols are explained in Sect. 2.2 and 2.3 of the main article.
